# Supplementary material
Source: PubMed Central journal article supplement (PMC6724214)
Supplement: NIHMS1047778-supplement-Supplement.pdf [file NIHMS1047778-supplement-Supplement.pdf]

Supplementary Materials

Supplementary Figure 1. Strong correlation of allele frequency in control subjects between sets 1 and 2.

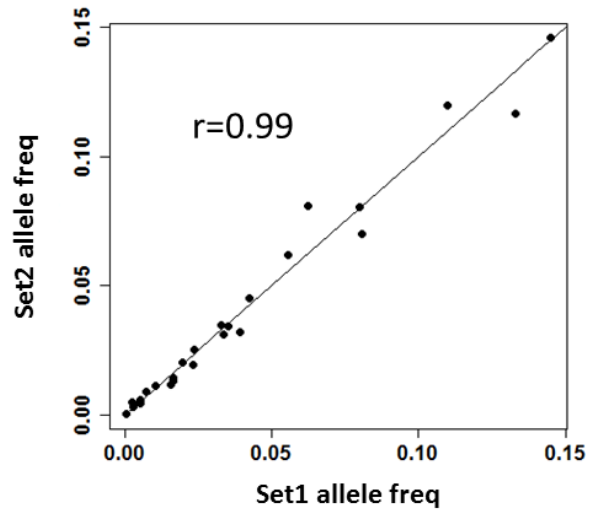

Each dot represents each of the all HLA-DRB1 alleles. The diagonal line indicates  $y=x$  line.

Supplementary Table 1. Non-additive HLA-DRB1 allelic effects on ACPA(+) RA susceptibility in the common data set.

| Allele     | Non-additive p       | Heterozygote OR (95%CI) | Homozygote OR* (95%CI) |
|------------|----------------------|-------------------------|------------------------|
| DRB1*01:01 | 0.27                 | 0.98 (0.85–1.13)        | 0.82 (0.62–1.09)       |
| DRB1*04:05 | $8.8 \times 10^{-5}$ | 2.39 (2.12–2.69)        | 1.85 (1.68–2.03)       |
| DRB1*09:01 | 0.095                | 0.87 (0.77–0.98)        | 0.98 (0.88–1.08)       |
| DRB1*15:01 | 0.090                | 0.61 (0.53–0.70)        | 0.47 (0.36–0.62)       |
| DRB1*15:02 | 0.00043              | 0.70 (0.62–0.79)        | 0.47 (0.38–0.58)       |

CI: confidence interval

\*odds ratio per allele

Supplementary Table 2. Interactive effects of allelic combinations in the common data set.

|            | DRB1*01:01           | DRB1*04:05           | DRB1*09:01       | DRB1*15:01       | DRB1*15:02       |
|------------|----------------------|----------------------|------------------|------------------|------------------|
| DRB1*01:01 | –                    | 1.17 (0.81–1.7)      | 0.81 (0.55–1.21) | 2.24 (1.34–3.75) | 2.38 (1.55–3.64) |
| DRB1*04:05 | 0.4                  | –                    | 1.15 (0.96–1.38) | 1.74 (1.23–2.45) | 1.78 (1.36–2.33) |
| DRB1*09:01 | 0.3                  | 0.13                 | –                | 0.83 (0.56–1.22) | 1.09 (0.81–1.46) |
| DRB1*15:01 | $2.2 \times 10^{-3}$ | $1.6 \times 10^{-3}$ | 0.34             | –                | 1.06 (0.65–1.73) |
| DRB1*15:02 | $6.8 \times 10^{-5}$ | $2.3 \times 10^{-5}$ | 0.58             | 0.83             | –                |

P-values and OR (95%CI) are indicated in sub- and super-diagonal, respectively. Red colors indicate significant p-values with positive effects.

Supplementary Table 3. Non-additive effects of amino acid positions on ACPA(+) RA susceptibility.

| Position | P                    | AA | P_AA                 | allele                                 | AA | P_AA   | allele         |
|----------|----------------------|----|----------------------|----------------------------------------|----|--------|----------------|
| 11       | 2.2x10 <sup>-4</sup> | V  | 7.0x10 <sup>-4</sup> | *04:05                                 | S  | 0.0029 | *08:03, *13:02 |
| 74       | 0.0018               | A  | 0.010                | *01:01, *04:05, *13:02, *15:01, *15:02 |    |        |                |
| 47       | 9.5x10 <sup>-5</sup> | Y  | 9.5x10 <sup>-5</sup> | *01:01, *04:05, *08:03, *09:01         |    |        |                |
| 37       | 1.6x10 <sup>-5</sup> | Y  | 3.2x10 <sup>-4</sup> | *04:05, *08:03                         |    |        |                |

AA: amino acid residues which are the main drivers of associations at the respective positions. HLA-DRB1 alleles included in full data set are indicated.

Supplementary Table 4. Lack of evidence of non-additive HLA-DRB1 effects on ACPA levels in the full data set.

|            | Non-additive p | Heterozygote Beta (SE) | Homozygote Beta (SE) |
|------------|----------------|------------------------|----------------------|
| DRB1*01:01 | 0.14           | 0.13 (0.035)           | 0.01 (0.076)         |
| DRB1*04:05 | 0.041          | 0.15 (0.027)           | 0.09 (0.022)         |
| DRB1*08:03 | 0.81           | -0.15 (0.043)          | -0.13 (0.065)        |
| DRB1*09:01 | 0.85           | -0.25 (0.027)          | -0.24 (0.025)        |
| DRB1*13:02 | 0.26           | 0 (0.044)              | -0.13 (0.101)        |
| DRB1*15:01 | 0.83           | 0.17 (0.038)           | 0.15 (0.081)         |
| DRB1*15:02 | 0.71           | 0.15 (0.031)           | 0.12 (0.063)         |

SE:standard error

Supplementary Table 5. Lack of evidence of non-additive effects on ACPA levels in the common data set.

| Allele     | Non-additive p | Heterozygote Beta (SE) | Homozygote Beta (SE) |
|------------|----------------|------------------------|----------------------|
| DRB1*01:01 | 0.16           | 0.12 (0.038)           | 0 (0.077)            |
| DRB1*04:05 | 0.27           | 0.11 (0.032)           | 0.07 (0.023)         |
| DRB1*09:01 | 0.50           | -0.24 (0.031)          | -0.26 (0.025)        |
| DRB1*15:01 | 0.89           | 0.15 (0.04)            | 0.14 (0.082)         |
| DRB1*15:02 | 0.72           | 0.14 (0.033)           | 0.11 (0.064)         |

SE:standard error

Supplementary Table 6. Lack of evidence of interactive effects on ACPA levels in the common data set.

|            | DRB1*01:01 | DRB1*04:05    | DRB1*09:01    | DRB1*15:01     | DRB1*15:02     |
|------------|------------|---------------|---------------|----------------|----------------|
| DRB1*01:01 | –          | 0.104 (0.094) | 0.11 (0.103)  | 0.29 (0.143)   | –0.008 (0.116) |
| DRB1*04:05 | 0.27       | –             | 0.041 (0.042) | –0.071 (0.095) | 0.061 (0.075)  |
| DRB1*09:01 | 0.29       | 0.32          | –             | 0.031 (0.115)  | 0 (0.085)      |
| DRB1*15:01 | 0.04       | 0.46          | 0.79          | –              | –0.028 (0.145) |
| DRB1*15:02 | 0.94       | 0.42          | 1             | 0.85           | –              |

P-values and beta (SE) are indicated in sub- and super-diagonal, respectively.

Supplementary Table 7. Non-additive effects of amino acid positions on ACPA levels

| Position | P     |
|----------|-------|
| 74       | 0.047 |
| 57       | 0.64  |

Supplementary Table 8. Lack of evidence of interactive effects on ACPA levels in the full data set using ACPA(+) and (-) RA.

|            | DRB1*01:01 | DRB1*04:05    | DRB1*08:03     | DRB1*09:01    | DRB1*13:02     | DRB1*15:01     | DRB1*15:02     |
|------------|------------|---------------|----------------|---------------|----------------|----------------|----------------|
| DRB1*01:01 | -          | 0.039 (0.182) | -0.241 (0.243) | 0.052 (0.19)  | -0.223 (0.299) | 0.488 (0.262)  | -0.07 (0.207)  |
| DRB1*04:05 | 0.83       | -             | -0.318 (0.149) | 0.157 (0.068) | 0.416 (0.151)  | 0.49 (0.175)   | 0.079 (0.126)  |
| DRB1*08:03 | 0.32       | 0.03          | -              | -0.01 (0.138) | 0.361 (0.317)  | 0.403 (0.289)  | -0.109 (0.241) |
| DRB1*09:01 | 0.78       | 0.02          | 0.95           | -             | 0.3 (0.176)    | 0.454 (0.201)  | -0.103 (0.139) |
| DRB1*13:02 | 0.46       | 0.006         | 0.25           | 0.09          | -              | -0.042 (0.341) | -0.51 (0.322)  |
| DRB1*15:01 | 0.06       | 0.005         | 0.16           | 0.02          | 0.9            | -              | 0.02 (0.25)    |
| DRB1*15:02 | 0.73       | 0.53          | 0.65           | 0.46          | 0.11           | 0.94           | -              |

P-values and beta (SE) are indicated in sub- and super-diagonal, respectively.
